# Supplementary material for: Main Ustilaginoidins and Their Distribution in Rice False Smut Balls
Source: PubMed Central journal article supplement (PMC4626718; doi:10.3390/toxins7104023), 2015-10-09
Supplement: toxins-07-04023-s001.pdf [file toxins-07-04023-s001.pdf]

## Supplementary Information

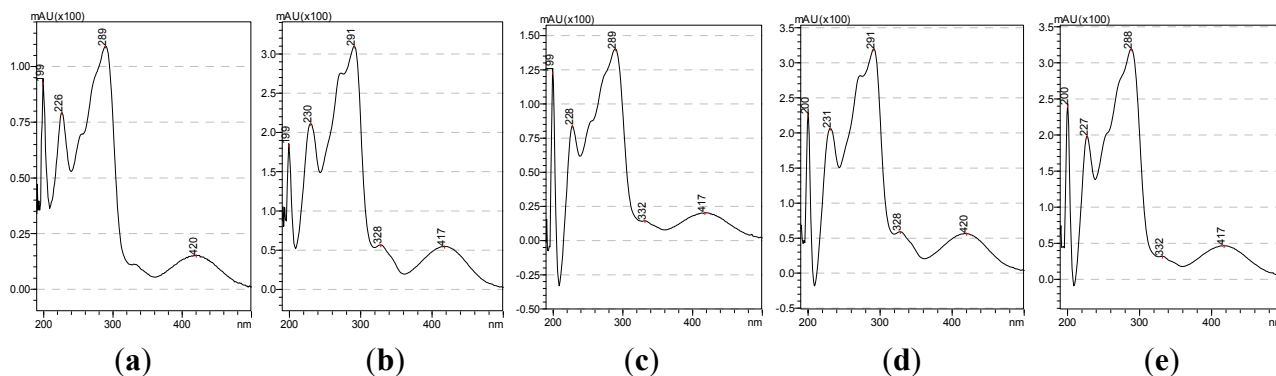

**Figure S1.** UV absorption spectra of ustilaginoidins C (a), I (b), B (c), G (d) and A (e).

**Table S1.** The data of  $^{13}\text{C}$  NMR and  $^1\text{H}$  NMR for ustilaginoidins A (1) and G (2).

| Position              | Ustilaginoidin A (1)          |                            | Ustilaginoidin G (2)          |                                                   |
|-----------------------|-------------------------------|----------------------------|-------------------------------|---------------------------------------------------|
|                       | $^{13}\text{C}$ NMR (150 MHz) | $^1\text{H}$ NMR (600 MHz) | $^{13}\text{C}$ NMR (150 MHz) | $^1\text{H}$ NMR (600 MHz)                        |
| 2, 2'                 | 171.0                         | -                          | 74.1, 171.0                   | 4.42 ddq (11.9, 2.4, 5.9)<br>2.80 dd (17.4, 11.9) |
| 3, 3'                 | 106.3                         | 6.11 s                     | 43.6, 105.3                   | 2.72 dd (17.2, 2.4)<br>5.90 s                     |
| 4, 4'                 | 184.7                         | -                          | 184.7, 199.4                  | -                                                 |
| 4a, 4a'               | 102.8                         | -                          | 102.7, 102.7                  | -                                                 |
| 5, 5'                 | 160.7                         | -                          | 161.7, 163.2                  | -                                                 |
| 5a, 5a'               | 106.6                         | -                          | 102.8, 105.3                  | -                                                 |
| 6, 6'                 | 154.6                         | -                          | 156.6, 159.6                  | -                                                 |
| 7, 7'                 | 99.6                          | 6.62 s                     | 99.6, 100.1                   | 6.50 s<br>6.60 s                                  |
| 8, 8'                 | 159.7                         | -                          | 160.6, 161.6                  | -                                                 |
| 9, 9'                 | 107.0                         | -                          | 106.6, 106.9                  | -                                                 |
| 9a, 9a'               | 141.2                         | -                          | 141.1, 143.1                  | -                                                 |
| 10, 10'               | 101.5                         | 6.36 s                     | 100.7, 101.4                  | 6.11 s<br>6.38 s                                  |
| 10a, 10a'             | 153.4                         | -                          | 153.4, 154.6                  | -                                                 |
| 2, 2'-CH <sub>3</sub> | 20.6                          | 2.30 s                     | 20.6, 20.9                    | 1.34 d (5.9)<br>2.31 s                            |

Note: Ustilaginoidins A (1) and G (2) were measured in acetone- $d_6$ , Chemical shifts were given on the  $\delta$  (ppm) scale with TMS as the internal standard and coupling constants (J) were given in Hz. The letters s, d, dd and ddq meant singlet, doublet, doublet of doublets, and doublet of doublet of quartets, respectively in NMR spectrum. The letters a and a' meant the positions in the chemical structures shown in Figure 1.

**Table S2.** The data of  $^{13}\text{C}$  NMR and  $^1\text{H}$  NMR for ustilaginoidins B (**3**), I (**4**) and C (**5**).

| Position                 | Ustilaginoidin B ( <b>3</b> )    |                               | Ustilaginoidin I ( <b>4</b> )    |                               | Ustilaginoidin C ( <b>5</b> )    |                               |
|--------------------------|----------------------------------|-------------------------------|----------------------------------|-------------------------------|----------------------------------|-------------------------------|
|                          | $^{13}\text{C}$ NMR<br>(150 MHz) | $^1\text{H}$ NMR<br>(600 MHz) | $^{13}\text{C}$ NMR<br>(150 MHz) | $^1\text{H}$ NMR<br>(600 MHz) | $^{13}\text{C}$ NMR<br>(150 MHz) | $^1\text{H}$ NMR<br>(600 MHz) |
| 2, 2'                    | 169.7                            | -                             | 77.3                             | 4.34 d (9.5)                  | 172.4                            | -                             |
|                          | 172.4                            |                               | 169.8                            |                               |                                  |                               |
| 3, 3'                    | 103.4                            | 6.16 s                        | 37.7                             | 2.92 dd (17.3, 12.5)          | 103.3                            | 6.17 s                        |
|                          | 105.9                            | 6.16 s                        | 105.8                            | 2.61 d (17.2)                 |                                  |                               |
|                          |                                  |                               |                                  | 5.70 s                        |                                  |                               |
| 4, 4'                    | 183.3                            | -                             | 183.3                            | -                             | 183.4                            | -                             |
|                          | 183.4                            |                               | 198.0                            |                               |                                  |                               |
| 4a, 4a'                  | 101.7                            | -                             | 101.7                            | -                             | 102.1                            | -                             |
|                          | 102.2                            |                               | 101.8                            |                               |                                  |                               |
| 5, 5'                    | 162.7                            | -                             | 162.6                            | -                             | 162.6                            | -                             |
|                          | 162.7                            |                               | 164.7                            |                               |                                  |                               |
| 5a, 5a'                  | 105.9                            | -                             | 104.3                            | -                             | 105.9                            | -                             |
|                          | 106.4                            |                               | 105.8                            |                               |                                  |                               |
| 6, 6'                    | 158.1                            | -                             | 157.9                            | -                             | 158.0                            | -                             |
|                          | 158.1                            |                               | 158.8                            |                               |                                  |                               |
| 7, 7'                    | 98.0                             | 6.59 s                        | 98.0                             | 6.47 s                        | 98.2                             | 6.61 s                        |
|                          | 98.2                             | 6.60 s                        | 98.5                             | 6.57 s                        |                                  |                               |
| 8, 8'                    | 159.1                            | -                             | 159.0                            | -                             | 159.2                            | -                             |
|                          | 159.2                            |                               | 160.1                            |                               |                                  |                               |
| 9, 9'                    | 106.4                            | -                             | 106.6                            | -                             | 106.4                            | -                             |
|                          | 106.4                            |                               | 106.9                            |                               |                                  |                               |
| 9a, 9a'                  | 139.8                            | -                             | 139.7                            | -                             | 139.9                            | -                             |
|                          | 140.0                            |                               | 141.6                            |                               |                                  |                               |
| 10, 10'                  | 100.8                            | 6.16 s                        | 100.0                            | 6.17 s                        | 100.9                            | 6.20 s                        |
|                          | 100.8                            | 6.20 s                        | 100.7                            | 6.20 s                        |                                  |                               |
| 10a, 10a'                | 151.7                            | -                             | 151.9                            | -                             | 151.6                            | -                             |
|                          | 152.0                            |                               | 154.8                            |                               |                                  |                               |
| 2, 2'-CH <sub>3</sub>    | 20.2                             | 2.24 s                        | 20.2                             | 2.27 s                        | -                                | -                             |
| 2, 2'-CH <sub>2</sub> OH | -                                | 4.27 s                        | -                                | 3.53 dd (18.4, 2.8)           | -                                | 4.27 d (4.4)                  |
| 2, 2'-CH <sub>2</sub> OH | -                                | 5.76 s                        | -                                | 4.98 br.s                     | -                                | nd                            |
| 6, 6'-OH                 | -                                | 10.03 s                       | -                                | 9.97 s                        | -                                | 9.97 s                        |
|                          |                                  | 10.03 s                       |                                  | 2H                            |                                  |                               |
| 8, 8'-OH                 | -                                | 9.82 s                        | -                                | 9.79 s                        | -                                | 9.82 s                        |
|                          |                                  | 9.82 s                        |                                  | 9.78 s                        |                                  |                               |
| 2, 2'-CH <sub>2</sub> OH | 59.8                             | -                             | 62.7                             | -                             | 59.8                             | -                             |

Note: Ustilaginoidins B (**3**), I (**4**) and C (**5**) were measured in DMSO-*d*<sub>6</sub>. Chemical shifts were given on the  $\delta$  (ppm) scale with TMS as the internal standard and coupling constants (J) were given in Hz. nd: not detected. The letters s, d, dd and br.s meant singlet, doublet, doublet of doublets, and broad-singlet, respectively in NMR spectrum. The letters a and a' meant the positions in the chemical structures shown in Figure 1.
